# Supplementary material
Source: publisher figshare collection journal article supplement (https://acs.figshare.com/ndownloader/files/25278456)
Supplement: Supplementary file 1 [file 25278456]

## Supporting Information

### **Cupriferous Silver Peroxysulfite Superpyramids as a Universal and Long-Lasting Agent to Eradicate Multidrug-Resistant Bacteria and Promote Wound Healing**

Wanlin Li,<sup>†,‡</sup> Yanling Wang,<sup>‡,‡</sup> Yuchen Qi,<sup>§</sup> Danni Zhong,<sup>§</sup> Tingting Xie,<sup>§</sup> Ke Yao,<sup>||</sup> Shikuan Yang,<sup>‡,\*</sup> and Min Zhou<sup>†,§,#,\*</sup>

<sup>†</sup> The Fourth Affiliated Hospital, Zhejiang University School of Medicine, Yiwu 322000, China

<sup>‡</sup> Institute for Composites Science Innovation, School of Materials Science and Engineering, Zhejiang University, Hangzhou, 310027, China

<sup>§</sup> The Institute of Translational Medicine, Zhejiang University, Hangzhou 310029

<sup>||</sup> Eye Center, The Second Affiliated Hospital, Zhejiang University School of Medicine, Hangzhou 310009, China

<sup>#</sup> State Key Laboratory of Modern Optical Instrumentations, Zhejiang University, Hangzhou 310058, P. R. China

<sup>‡</sup> These authors contributed equally.

\*Corresponding authors:

E-mail: zhoum@zju.edu.cn (Min Zhou)

E-mail: shkyang@zju.edu.cn (Shikuan Yang)

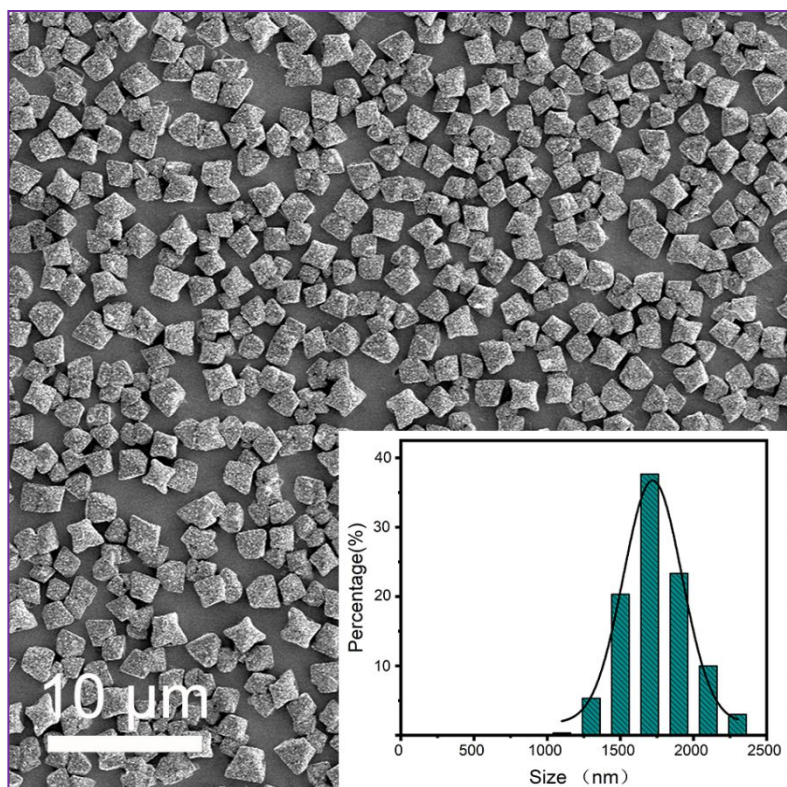

**Figure S1.** Scanning electron microscopy image of AOHS particles (Insert: Size distribution obtained from measuring 300 AOHS particles on the gold-coated wafer).

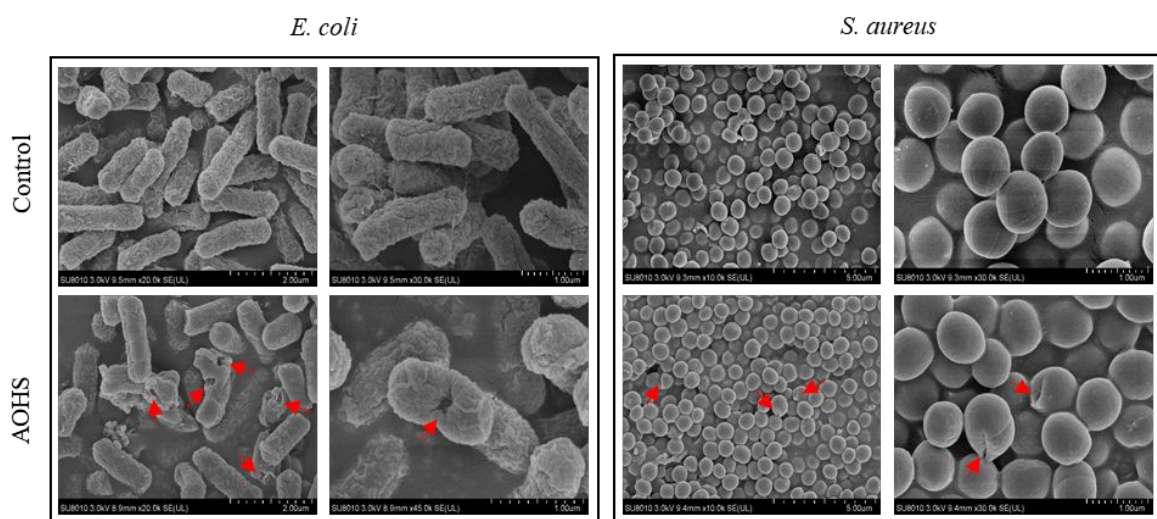

**Figure S2.** *E. coli* and *S. aureus* treated with AOHS observed by SEM (damaged parts marked with red arrows) proved that the AOHS could destroy the membranes of bacteria.

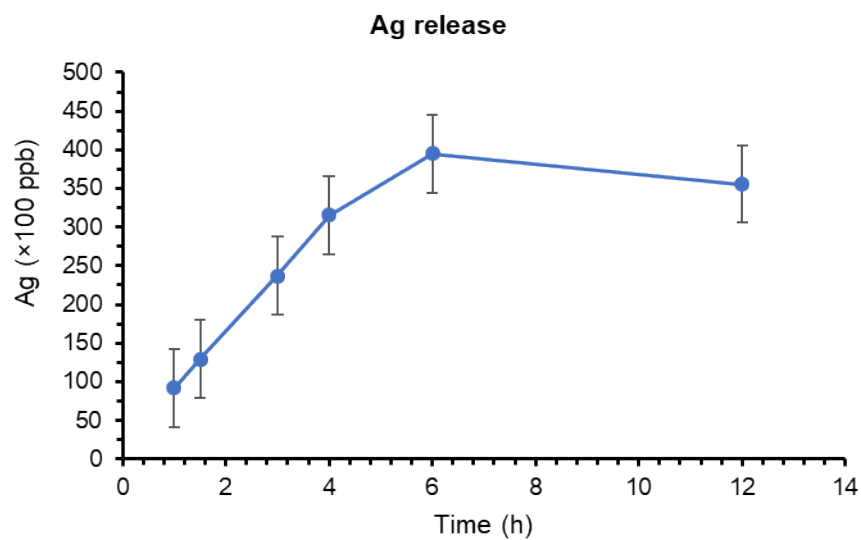

**Figure S3.** Ag released by the AOHS pyramids in water with time increasing detected by ICP-MS.

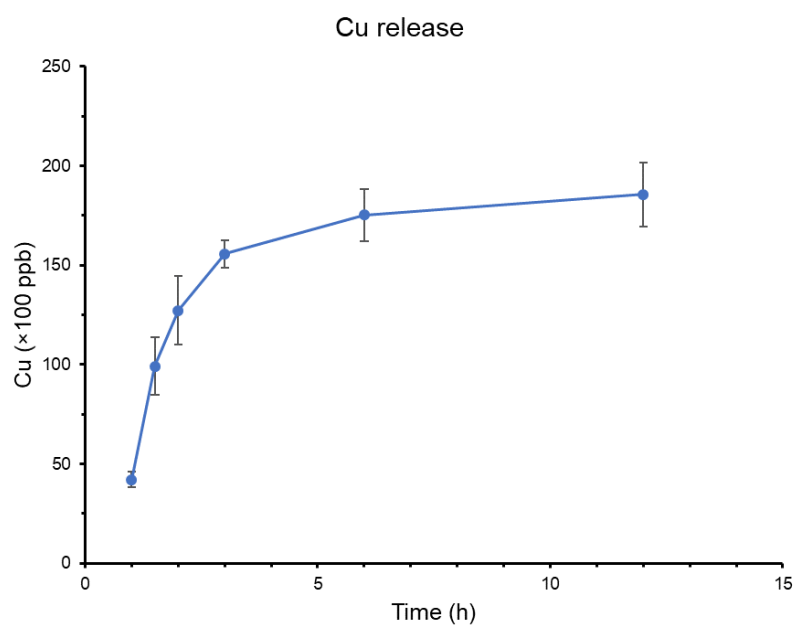

**Figure S4.** Cu released by the cupriforous AOHS pyramids in water with time increasing detected by ICP-MS.

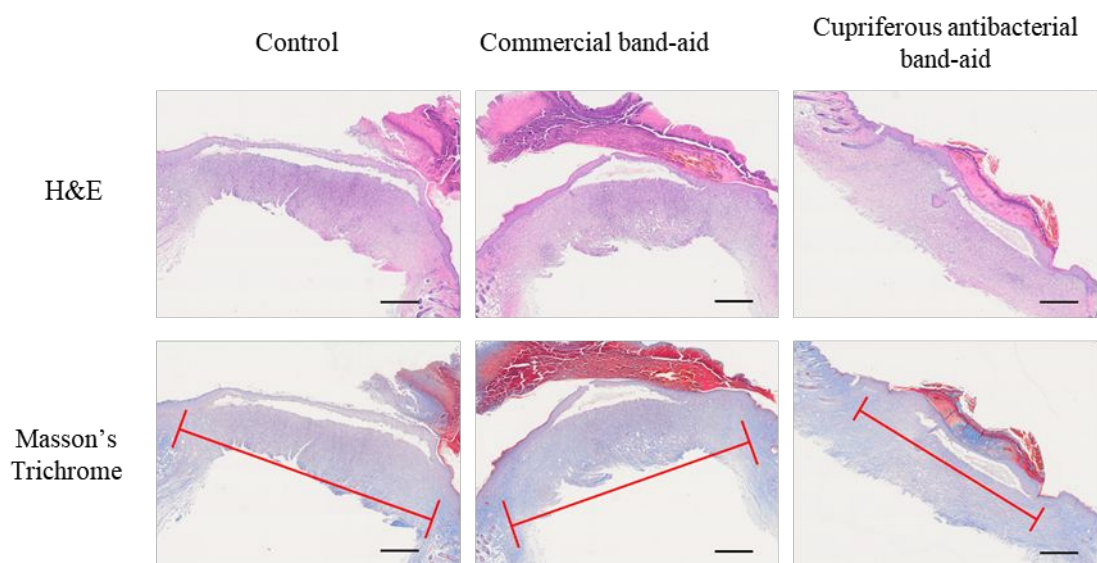

**Figure S5.** H&E and Masson's trichrome staining of wound tissues after various treatments. Red lines mark the collagen gap of the wound area. Bar = 200  $\mu$ m

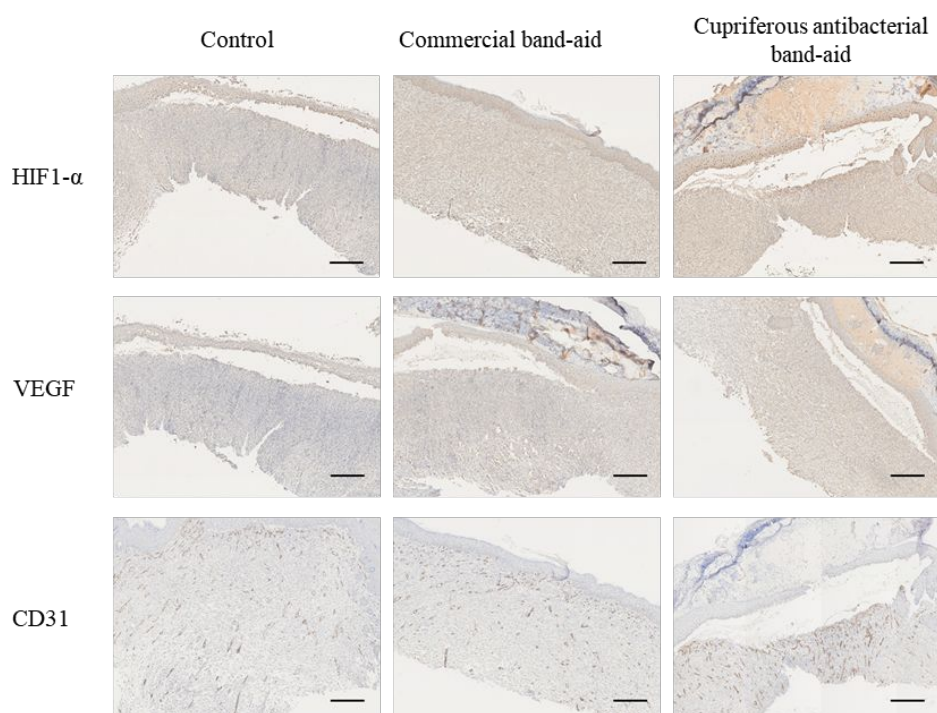

**Figure S6.** The immunohistological analysis of the mice wounds. Bar = 200  $\mu$ m



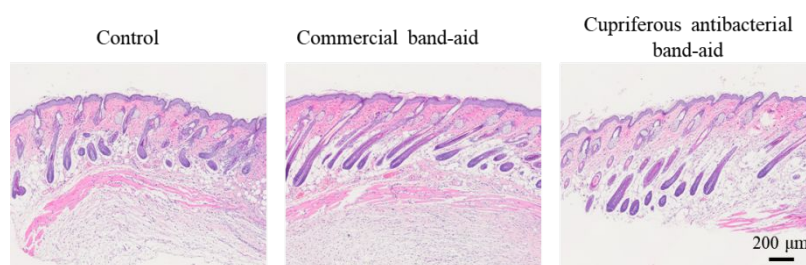

**Figure S7.** H&E staining of skin slices around wounds. The cupriferous antibacterial band-aid treated tissue should no difference with the commercial band-aid and the control group, indicating that the cupriferous antibacterial band-aid was biocompatible for wound healing.

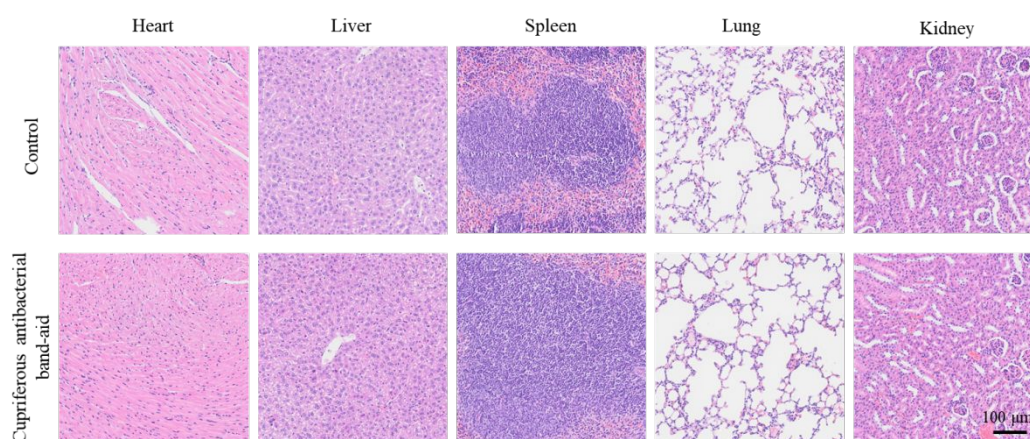

**Figure S8.** Pilot Toxicity Study of major organs in the MRSA infected model. H&E staining images of the major organs' slices showed no difference between the cupriferous antibacterial band-aid treated group and the untreated control group. Scale bar = 100 µm.
